# Supplementary material for: RUVBL1 in Clear-Cell Renal Cell Carcinoma: Unraveling Prognostic Significance and Correlation with HIF1A
Source: MDPI journal article supplement (doi:10.3390/cancers16071273), 2024-03-25
Supplement: s1 [file s1]

## Supplementary Materials

**Supplementary Table S1.** Clinicopathological characteristics of 475 patients with ccRCC from TCGA cohort.

| Variables        | Number (%)  |
|------------------|-------------|
| <b>Gender</b>    |             |
| Females          | 163 (34.32) |
| Males            | 312 (65.68) |
| <b>Age</b>       |             |
| ≤60              | 239 (50.32) |
| >60              | 236 (49.68) |
| <b>Grade</b>     |             |
| G1               | 11 (2.32)   |
| G2               | 203 (42.74) |
| G3               | 189 (39.79) |
| G4               | 72 (15.16)  |
| <b>pT status</b> |             |
| T1               | 237 (49.89) |
| T2               | 61 (12.84)  |
| T3               | 167 (35.16) |
| T4               | 10 (2.11)   |
| <b>pN status</b> |             |
| Nx               | 235 (49.47) |
| N0               | 225 (47.37) |
| N1               | 15 (3.16)   |
| <b>Stage</b>     |             |
| I                | 234 (49.26) |
| II               | 50 (10.53)  |
| III              | 119 (25.05) |
| IV               | 72 (15.16)  |

**Supplementary Table S2.** Clinicopathological characteristics of 99 patients with ccRCC from our cohort.

| Variables        | Number (%) |
|------------------|------------|
| <b>Gender</b>    |            |
| Females          | 31 (31.31) |
| Males            | 68 (68.69) |
| <b>Age</b>       |            |
| ≤64              | 58 (58.59) |
| >64              | 41 (41.41) |
| <b>Grade</b>     |            |
| G1               | 25 (25.25) |
| G2               | 64 (64.65) |
| G3               | 10 (10.10) |
| <b>pT status</b> |            |
| Tx               | 1          |
| T1               | 28 (28.57) |

|           |            |
|-----------|------------|
| T2        | 28 (28.57) |
| T3 i T4   | 42 (42.86) |
| pN status |            |
| N0        | 92 (92.93) |
| N1        | 7 (7.07)   |

---
